# Supplementary material for: Modified influenza M158–66 peptide vaccination induces non-relevant T-cells and may enhance pathology after challenge
Source: PubMed Central journal article supplement (PMC10423225; doi:10.1038/s41541-023-00705-y), 2023-08-12
Supplement: 41541_2023_705_MOESM2_ESM.pdf [file 41541_2023_705_MOESM2_ESM.pdf]

## Reporting Summary

Nature Portfolio wishes to improve the reproducibility of the work that we publish. This form provides structure for consistency and transparency in reporting. For further information on Nature Portfolio policies, see our [Editorial Policies](#) and the [Editorial Policy Checklist](#).

### Statistics

For all statistical analyses, confirm that the following items are present in the figure legend, table legend, main text, or Methods section.

n/a Confirmed

- |                                     |                                     |                                                                                                                                                                                                                                                            |
|-------------------------------------|-------------------------------------|------------------------------------------------------------------------------------------------------------------------------------------------------------------------------------------------------------------------------------------------------------|
| <input type="checkbox"/>            | <input checked="" type="checkbox"/> | The exact sample size ( $n$ ) for each experimental group/condition, given as a discrete number and unit of measurement                                                                                                                                    |
| <input type="checkbox"/>            | <input checked="" type="checkbox"/> | A statement on whether measurements were taken from distinct samples or whether the same sample was measured repeatedly                                                                                                                                    |
| <input type="checkbox"/>            | <input checked="" type="checkbox"/> | The statistical test(s) used AND whether they are one- or two-sided<br><i>Only common tests should be described solely by name; describe more complex techniques in the Methods section.</i>                                                               |
| <input checked="" type="checkbox"/> | <input type="checkbox"/>            | A description of all covariates tested                                                                                                                                                                                                                     |
| <input type="checkbox"/>            | <input checked="" type="checkbox"/> | A description of any assumptions or corrections, such as tests of normality and adjustment for multiple comparisons                                                                                                                                        |
| <input type="checkbox"/>            | <input checked="" type="checkbox"/> | A full description of the statistical parameters including central tendency (e.g. means) or other basic estimates (e.g. regression coefficient) AND variation (e.g. standard deviation) or associated estimates of uncertainty (e.g. confidence intervals) |
| <input checked="" type="checkbox"/> | <input type="checkbox"/>            | For null hypothesis testing, the test statistic (e.g. $F$ , $t$ , $r$ ) with confidence intervals, effect sizes, degrees of freedom and $P$ value noted<br><i>Give <math>P</math> values as exact values whenever suitable.</i>                            |
| <input checked="" type="checkbox"/> | <input type="checkbox"/>            | For Bayesian analysis, information on the choice of priors and Markov chain Monte Carlo settings                                                                                                                                                           |
| <input checked="" type="checkbox"/> | <input type="checkbox"/>            | For hierarchical and complex designs, identification of the appropriate level for tests and full reporting of outcomes                                                                                                                                     |
| <input checked="" type="checkbox"/> | <input type="checkbox"/>            | Estimates of effect sizes (e.g. Cohen's $d$ , Pearson's $r$ ), indicating how they were calculated                                                                                                                                                         |

*Our web collection on [statistics for biologists](#) contains articles on many of the points above.*

### Software and code

Policy information about [availability of computer code](#)

Data collection

Data analysis

For manuscripts utilizing custom algorithms or software that are central to the research but not yet described in published literature, software must be made available to editors and reviewers. We strongly encourage code deposition in a community repository (e.g. GitHub). See the Nature Portfolio [guidelines for submitting code & software](#) for further information.

### Data

Policy information about [availability of data](#)

All manuscripts must include a [data availability statement](#). This statement should provide the following information, where applicable:

- Accession codes, unique identifiers, or web links for publicly available datasets
- A description of any restrictions on data availability
- For clinical datasets or third party data, please ensure that the statement adheres to our [policy](#)

## Human research participants

Policy information about [studies involving human research participants and Sex and Gender in Research](#).

|                             |                                                                             |
|-----------------------------|-----------------------------------------------------------------------------|
| Reporting on sex and gender | <input type="text" value="No human derived data was used for this study."/> |
| Population characteristics  | <input type="text" value="See above."/>                                     |
| Recruitment                 | <input type="text" value="See above."/>                                     |
| Ethics oversight            | <input type="text" value="See above."/>                                     |

Note that full information on the approval of the study protocol must also be provided in the manuscript.

## Field-specific reporting

Please select the one below that is the best fit for your research. If you are not sure, read the appropriate sections before making your selection.

Life sciences       Behavioural & social sciences       Ecological, evolutionary & environmental sciences

For a reference copy of the document with all sections, see [nature.com/documents/nr-reporting-summary-flat.pdf](https://www.nature.com/documents/nr-reporting-summary-flat.pdf)

## Life sciences study design

All studies must disclose on these points even when the disclosure is negative.

|                 |                                                                                                                                                                                                                                                                                                                                                                               |
|-----------------|-------------------------------------------------------------------------------------------------------------------------------------------------------------------------------------------------------------------------------------------------------------------------------------------------------------------------------------------------------------------------------|
| Sample size     | <input type="text" value="Sample size was determined based on the difference in dextramer frequencies we wanted to obtain between the WT-peptide vaccinated mice and the mod vaccinated mice."/>                                                                                                                                                                              |
| Data exclusions | <input type="text" value="Only datapoint that was excluded in the flow cytometry data was 1 mouse of the MOD1 group (Fig 2+3) as the cells died during isolation and could not be used for measurements. Also datapoints in the ratio calculations were excluded, when there were less than 40 cells to do a calculation, to make sure the ratios would not be misleading."/> |
| Replication     | <input type="text" value="The experiment was split into two sub-experiments that were carried out separately (1 week time difference, n = 4 per group), but analyzed together (for a total of n = 8)."/>                                                                                                                                                                      |
| Randomization   | <input type="text" value="The animals were semi-randomly distributed; older mice were used first and younger mice were used in the later experiments."/>                                                                                                                                                                                                                      |
| Blinding        | <input type="text" value="The investigators were not blinded to the study as they had to prepare the vaccine and (mock-)infection inoculum and supervise the correct injection of the inoculum into the mice."/>                                                                                                                                                              |

## Reporting for specific materials, systems and methods

We require information from authors about some types of materials, experimental systems and methods used in many studies. Here, indicate whether each material, system or method listed is relevant to your study. If you are not sure if a list item applies to your research, read the appropriate section before selecting a response.

### Materials & experimental systems

| n/a                                 | Involvement in the study                                        |
|-------------------------------------|-----------------------------------------------------------------|
| <input type="checkbox"/>            | <input checked="" type="checkbox"/> Antibodies                  |
| <input checked="" type="checkbox"/> | <input type="checkbox"/> Eukaryotic cell lines                  |
| <input checked="" type="checkbox"/> | <input type="checkbox"/> Palaeontology and archaeology          |
| <input type="checkbox"/>            | <input checked="" type="checkbox"/> Animals and other organisms |
| <input checked="" type="checkbox"/> | <input type="checkbox"/> Clinical data                          |
| <input checked="" type="checkbox"/> | <input type="checkbox"/> Dual use research of concern           |

### Methods

| n/a                                 | Involvement in the study                           |
|-------------------------------------|----------------------------------------------------|
| <input checked="" type="checkbox"/> | <input type="checkbox"/> ChIP-seq                  |
| <input type="checkbox"/>            | <input checked="" type="checkbox"/> Flow cytometry |
| <input checked="" type="checkbox"/> | <input type="checkbox"/> MRI-based neuroimaging    |

## Antibodies

|                 |                                                                                                                                                                                                                               |
|-----------------|-------------------------------------------------------------------------------------------------------------------------------------------------------------------------------------------------------------------------------|
| Antibodies used | <input type="text" value="CD3(17A2)-FITC, CD8a-PerCP/Cy5.5 (53-6.7), Fixable Viability Stain 780, CD127(SB/199)-BV421, CD62L(MEL-14)-BV786, CD44(IM7)-PE/Cy7, KLRG1(2F1)-PE/CF594, CD4(GK1.5)-BUV395 (All BD Biosciences)."/> |
|-----------------|-------------------------------------------------------------------------------------------------------------------------------------------------------------------------------------------------------------------------------|

## Validation

Describe the validation of each primary antibody for the species and application, noting any validation statements on the manufacturer's website, relevant citations, antibody profiles in online databases, or data provided in the manuscript.

## Animals and other research organisms

Policy information about [studies involving animals](#); [ARRIVE guidelines](#) recommended for reporting animal research, and [Sex and Gender in Research](#)

|                         |                                                                                                                                                                                                                                         |
|-------------------------|-----------------------------------------------------------------------------------------------------------------------------------------------------------------------------------------------------------------------------------------|
| Laboratory animals      | HLA-A2 transgenic female mice, B6.Cg-Immp2I-Tg (HLA-A/H2-D)2Enge/J (Jackson Laboratory, USA)                                                                                                                                            |
| Wild animals            | study did not involve wild animals                                                                                                                                                                                                      |
| Reporting on sex        | Only female mice were used for this study, as it is known that male and female mice react differently to influenza infection, which would mean we would have needed double the amount of mice when using both sexes. Karnam et al. 2012 |
| Field-collected samples | Study did not involve samples collected from the field.                                                                                                                                                                                 |
| Ethics oversight        | The study was approved by the Animal Welfare Body of Poonawalla Science Park, Animal Research Center (Bilthoven, The Netherlands) under permit number AVD3260020173890 of the Dutch Central Committee for Animal experiments.           |

Note that full information on the approval of the study protocol must also be provided in the manuscript.

## Flow Cytometry

### Plots

Confirm that:

- The axis labels state the marker and fluorochrome used (e.g. CD4-FITC).
- The axis scales are clearly visible. Include numbers along axes only for bottom left plot of group (a 'group' is an analysis of identical markers).
- All plots are contour plots with outliers or pseudocolor plots.
- A numerical value for number of cells or percentage (with statistics) is provided.

### Methodology

|                           |                                                                                                                                                                      |
|---------------------------|----------------------------------------------------------------------------------------------------------------------------------------------------------------------|
| Sample preparation        | Approximately 2 million splenocytes and lysed whole blood cells were stained with an dextramers, next surface staining was performed for 30 min at 4 °C              |
| Instrument                | Data acquisition was performed on an LSRFortessa X-20.                                                                                                               |
| Software                  | Data analysis was performed using FlowJo v10.6.2 (BD) software.                                                                                                      |
| Cell population abundance | <i>Describe the abundance of the relevant cell populations within post-sort fractions, providing details on the purity of the samples and how it was determined.</i> |
| Gating strategy           | Lymphocytes (FSC-A/SSC-A) - single cells (FSC-A/FSC-H) - Live Dead (Livedead/SSC-A)- CD3+ (CD3/SSC-A)- CD8+ (CD8a/CD4) - GILG+, MOD+ DP+ (GILGmod/GILGWT dextramer). |

- Tick this box to confirm that a figure exemplifying the gating strategy is provided in the Supplementary Information.
